# Supplementary material
Source: PubMed Central journal article supplement (PMC10155000)
Supplement: sj-pdf-1-cob-10.1177_26335565231169567.pdf [file sj-pdf-1-cob-10.1177_26335565231169567.pdf]

Supplementary File

*Simard M., Boiteau V, Fortin E, Jean S, Rochette L, Trépanier PL, Gilca R. Impact of chronic comorbidities on hospitalization, intensive care unit admission and death among adult vaccinated and unvaccinated COVID-19 confirmed cases during the Omicron wave, Journal of Multimorbidity and Comorbidity, 2023*

**Table A.1:** List of 21 pre-existing comorbidities

| Comorbidity                     | Included diseases <sup>a</sup>                                                                                                                  |
|---------------------------------|-------------------------------------------------------------------------------------------------------------------------------------------------|
| Hypertension                    | Hypertension                                                                                                                                    |
| Respiratory diseases            | Chronic pulmonary disease, Pulmonary circulation disorders                                                                                      |
| Cardiovascular diseases         | Cardiac arrhythmias, Peripheral vascular disorders, Myocardial infarction, Congestive heart failure, Valvular diseases, Cerebrovascular disease |
| Diabetes                        | Diabetes uncomplicated, Diabetes complicated                                                                                                    |
| Cancer                          | Any tumor without metastasis, Metastatic cancer                                                                                                 |
| Neurological disorders          | Dementia, Neurological disorders                                                                                                                |
| Kidney disease                  | Kidney disease                                                                                                                                  |
| Liver disease                   | Liver disease                                                                                                                                   |
| Immune system problem           | Rheumatoid arthritis / collagen vascular disease, AIDS/HIV                                                                                      |
| Obesity                         | Obesity                                                                                                                                         |
| Fluid and electrolyte disorders | Fluid and electrolyte disorders                                                                                                                 |
| Hypothyroidism                  | Hypothyroidism                                                                                                                                  |
| Psychosis                       | Psychosis                                                                                                                                       |
| Depression                      | Depression                                                                                                                                      |
| Alcohol abuse                   | Alcohol abuse                                                                                                                                   |
| Drug abuse                      | Drug abuse                                                                                                                                      |
| Weight loss                     | Weight loss                                                                                                                                     |
| Paralysis                       | Paralysis                                                                                                                                       |
| Coagulopathy                    | Coagulopathy                                                                                                                                    |
| Anaemia                         | Deficiency anemia, Blood loss anemia                                                                                                            |
| Ulcer                           | Ulcer diseases                                                                                                                                  |

<sup>a</sup> List of ICD codes for each included disease are available elsewhere: Simard M, Sirois C, Candas B. Validation of the Combined Comorbidity Index of Charlson and Elixhauser to Predict 30-Day Mortality Across ICD-9 and ICD-10. *Med Care.* 2018;56(5):441-7.

Supplementary File

Simard M., Boiteau V, Fortin E, Jean S, Rochette L, Trépanier PL, Gilca R. Impact of chronic comorbidities on hospitalization, intensive care unit admission and death among adult vaccinated and unvaccinated COVID-19 confirmed cases during the Omicron wave, *Journal of Multimorbidity and Comorbidity*, 2023

---

**Figure A.1:** Study selection flowchart

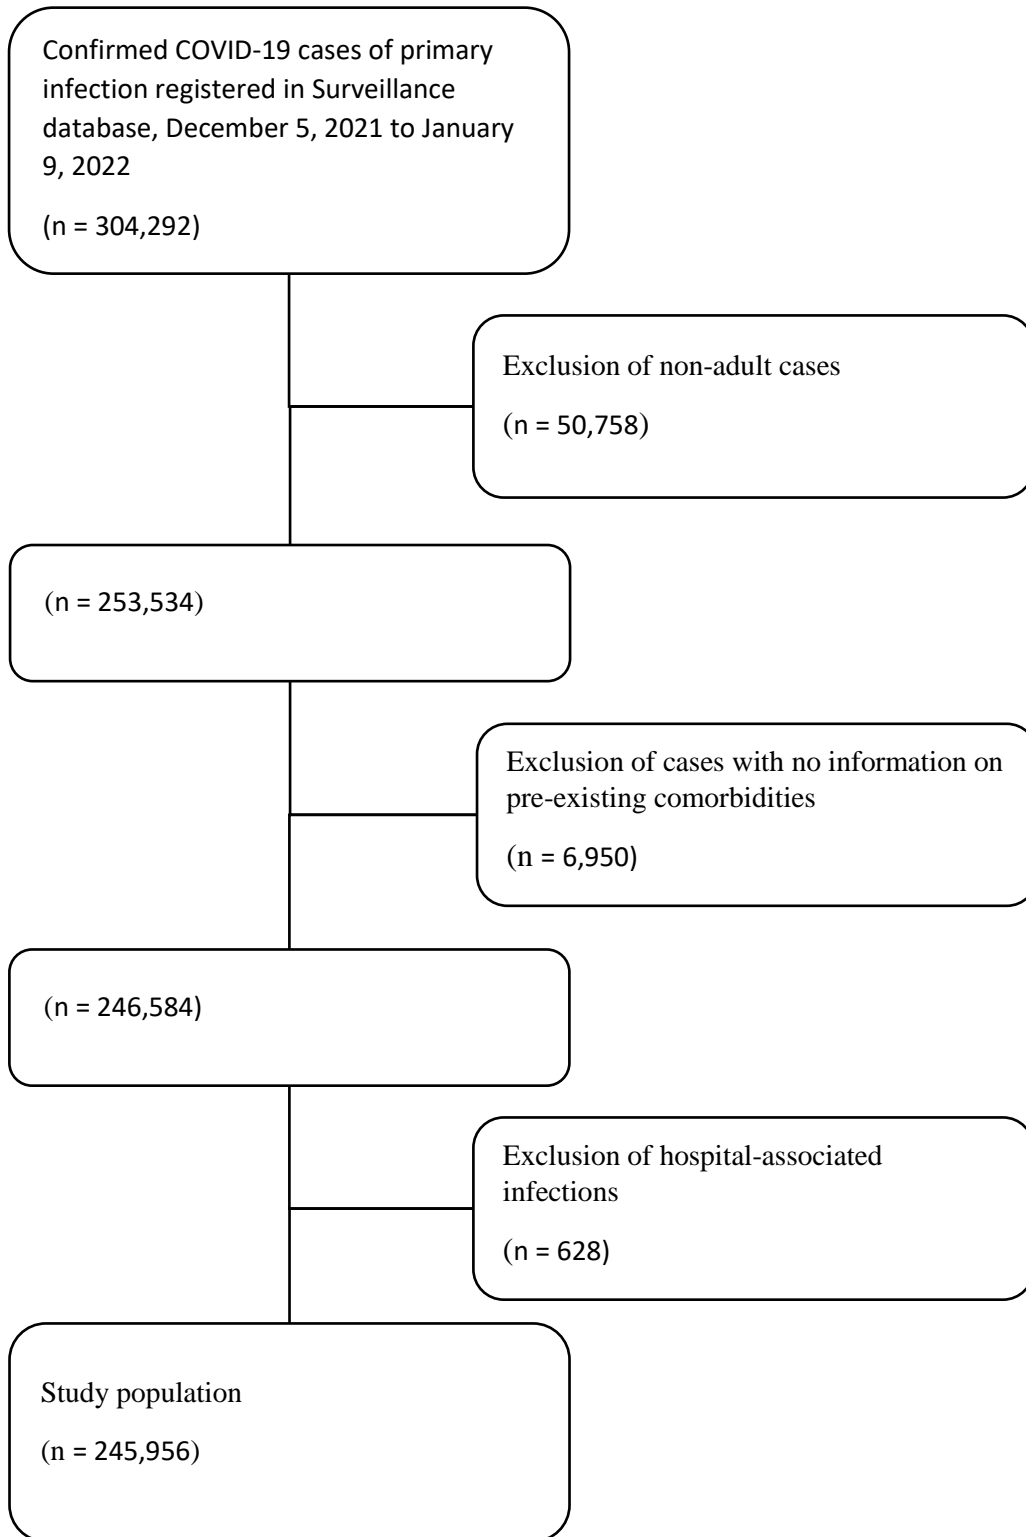

Supplementary File

Simard M., Boiteau V, Fortin E, Jean S, Rochette L, Trépanier PL, Gilca R. Impact of chronic comorbidities on hospitalization, intensive care unit admission and death among adult vaccinated and unvaccinated COVID-19 confirmed cases during the Omicron wave, *Journal of Multimorbidity and Comorbidity*, 2023

**Table A.2:** Percentage and 95% confidence interval of adults with COVID-19 identified between Dec 5<sup>th</sup> 2021-Jan 9<sup>th</sup> 2022 with COVID-19 hospitalisation, intensive care unit admission, or death by 13<sup>th</sup> February 2022 by number of comorbidities, stratified by age and vaccination status during the Omicron wave, Québec, Canada (n=245,956).

| Age group              | Number of comorbidities | Vaccinated <sup>a</sup> |           |       |                 | Unvaccinated <sup>a</sup> |           |       |                 |
|------------------------|-------------------------|-------------------------|-----------|-------|-----------------|---------------------------|-----------|-------|-----------------|
|                        |                         | Event                   | Non-event | %     | 95% CI          | Event                     | Non-event | %     | 95% CI          |
| <b>Hospitalization</b> |                         |                         |           |       |                 |                           |           |       |                 |
| 18-49                  | 0                       | 195                     | 111,745   | 0.17  | (0.15 - 0.20)   | 237                       | 13,095    | 1.78  | (1.57 - 2.02)   |
|                        | 1                       | 95                      | 28,111    | 0.34  | (0.28 - 0.41)   | 73                        | 3,341     | 2.14  | (1.70 - 2.68)   |
|                        | 2                       | 39                      | 7,430     | 0.52  | (0.38 - 0.71)   | 36                        | 955       | 3.63  | (2.64 - 5.01)   |
|                        | ≥3                      | 92                      | 3,813     | 2.36  | (1.93 - 2.88)   | 39                        | 550       | 6.62  | (4.89 - 8.97)   |
| 50-64                  | 0                       | 67                      | 24,319    | 0.27  | (0.22 - 0.35)   | 96                        | 1,722     | 5.28  | (4.35 - 6.42)   |
|                        | 1                       | 77                      | 13,204    | 0.58  | (0.46 - 0.72)   | 71                        | 881       | 7.46  | (5.96 - 9.33)   |
|                        | 2                       | 66                      | 5,193     | 1.25  | (0.99 - 1.59)   | 31                        | 302       | 9.31  | (6.66 - 13.02)  |
|                        | ≥3                      | 221                     | 4,081     | 5.14  | (4.52 - 5.84)   | 66                        | 302       | 17.93 | (14.41 - 22.32) |
| 65-74                  | 0                       | 51                      | 3,334     | 1.51  | (1.15 - 1.98)   | 48                        | 213       | 18.39 | (14.24 - 23.75) |
|                        | 1                       | 86                      | 3,375     | 2.48  | (2.02 - 3.06)   | 42                        | 123       | 25.45 | (19.60 - 33.05) |
|                        | 2                       | 75                      | 2,013     | 3.59  | (2.88 - 4.49)   | 33                        | 81        | 28.95 | (21.71 - 38.59) |
|                        | ≥3                      | 402                     | 2,700     | 12.96 | (11.83 - 14.20) | 73                        | 136       | 34.93 | (29.03 - 42.03) |
| ≥75                    | 0                       | 55                      | 765       | 6.71  | (5.20 - 8.66)   | 26                        | 48        | 35.14 | (25.78 - 47.88) |
|                        | 1                       | 158                     | 1,597     | 9.00  | (7.76 - 10.45)  | 48                        | 85        | 36.09 | (28.79 - 45.25) |
|                        | 2                       | 178                     | 1,635     | 9.82  | (8.54 - 11.29)  | 50                        | 86        | 36.76 | (29.49 - 45.83) |
|                        | ≥3                      | 1,238                   | 6,176     | 16.70 | (15.87 - 17.57) | 178                       | 303       | 37.01 | (32.93 - 41.58) |
| <b>ICU admission</b>   |                         |                         |           |       |                 |                           |           |       |                 |
| 18-49                  | 0                       | 10                      | 111,930   | 0.01  | (0.00 - 0.02)   | 44                        | 13,288    | 0.33  | (0.25 - 0.44)   |
|                        | 1                       | 9                       | 28,197    | 0.03  | (0.02 - 0.06)   | 17                        | 3,397     | 0.50  | (0.31 - 0.80)   |
|                        | 2                       | 7                       | 7,462     | 0.09  | (0.04 - 0.20)   | 9                         | 982       | 0.91  | (0.47 - 1.74)   |

Supplementary File

Simard M., Boiteau V, Fortin E, Jean S, Rochette L, Trépanier PL, Gilca R. Impact of chronic comorbidities on hospitalization, intensive care unit admission and death among adult vaccinated and unvaccinated COVID-19 confirmed cases during the Omicron wave, *Journal of Multimorbidity and Comorbidity*, 2023

| Age group    | Number of comorbidities | Vaccinated <sup>a</sup> |           |       |                | Unvaccinated <sup>a</sup> |           |       |                |
|--------------|-------------------------|-------------------------|-----------|-------|----------------|---------------------------|-----------|-------|----------------|
|              |                         | Event                   | Non-event | %     | 95% CI         | Event                     | Non-event | %     | 95% CI         |
| 50-64        | ≥3                      | 11                      | 3,894     | 0.28  | (0.16 - 0.51)  | 6                         | 583       | 1.02  | (0.46 - 2.26)  |
|              | 0                       | 14                      | 24,372    | 0.06  | (0.03 - 0.10)  | 37                        | 1,781     | 2.04  | (1.48 - 2.80)  |
|              | 1                       | 14                      | 13,267    | 0.11  | (0.06 - 0.18)  | 25                        | 927       | 2.63  | (1.78 - 3.87)  |
|              | 2                       | 12                      | 5,247     | 0.23  | (0.13 - 0.40)  | 8                         | 325       | 2.40  | (1.21 - 4.76)  |
|              | ≥3                      | 46                      | 4,256     | 1.07  | (0.80 - 1.43)  | 19                        | 349       | 5.16  | (3.33 - 8.00)  |
| 65-74        | 0                       | 10                      | 3,375     | 0.30  | (0.16 - 0.55)  | 20                        | 241       | 7.66  | (5.03 - 11.68) |
|              | 1                       | 15                      | 3,446     | 0.43  | (0.26 - 0.72)  | 20                        | 145       | 12.12 | (8.04 - 18.28) |
|              | 2                       | 16                      | 2,072     | 0.77  | (0.47 - 1.25)  | 17                        | 97        | 14.91 | (9.62 - 23.12) |
|              | ≥3                      | 72                      | 3,030     | 2.32  | (1.85 - 2.92)  | 18                        | 191       | 8.61  | (5.54 - 13.39) |
| ≥75          | 0                       | 4                       | 816       | 0.49  | (0.18 - 1.30)  | 7                         | 67        | 9.46  | (4.67 - 19.14) |
|              | 1                       | 12                      | 1,743     | 0.68  | (0.39 - 1.20)  | 8                         | 125       | 6.02  | (3.07 - 11.78) |
|              | 2                       | 16                      | 1,797     | 0.88  | (0.54 - 1.44)  | 9                         | 127       | 6.62  | (3.52 - 12.44) |
|              | ≥3                      | 98                      | 7,316     | 1.32  | (1.09 - 1.61)  | 20                        | 461       | 4.16  | (2.71 - 6.39)  |
| <b>Death</b> |                         |                         |           |       |                |                           |           |       |                |
| 18-49        | 0                       | 0                       | 111,940   | <0.01 | (0.00 - 0.004) | 3                         | 13,329    | 0.02  | (0.01 - 0.07)  |
|              | 1                       | 1                       | 28,205    | <0.01 | (0.00 - 0.03)  | 0                         | 3,414     | <0.01 | (0.00 - 0.14)  |
|              | 2                       | 2                       | 7,467     | 0.03  | (0.01 - 0.11)  | 2                         | 989       | 0.20  | (0.05 - 0.81)  |
|              | ≥3                      | 2                       | 3,903     | 0.05  | (0.01 - 0.20)  | 1                         | 588       | 0.17  | (0.02 - 1.20)  |
| 50-64        | 0                       | 5                       | 24,381    | 0.02  | (0.01 - 0.05)  | 3                         | 1,815     | 0.17  | (0.05 - 0.51)  |
|              | 1                       | 8                       | 13,273    | 0.06  | (0.03 - 0.12)  | 10                        | 942       | 1.05  | (0.57 - 1.95)  |
|              | 2                       | 7                       | 5,252     | 0.13  | (0.06 - 0.28)  | 6                         | 327       | 1.80  | (0.82 - 3.98)  |
|              | ≥3                      | 34                      | 4,268     | 0.79  | (0.57 - 1.10)  | 10                        | 358       | 2.72  | (1.47 - 5.01)  |
| 65-74        | 0                       | 6                       | 3,379     | 0.18  | (0.08 - 0.39)  | 10                        | 251       | 3.83  | (2.09 - 7.04)  |
|              | 1                       | 14                      | 3,447     | 0.40  | (0.24 - 0.68)  | 9                         | 156       | 5.45  | (2.89 - 10.30) |

Supplementary File

Simard M., Boiteau V, Fortin E, Jean S, Rochette L, Trépanier PL, Gilca R. Impact of chronic comorbidities on hospitalization, intensive care unit admission and death among adult vaccinated and unvaccinated COVID-19 confirmed cases during the Omicron wave, *Journal of Multimorbidity and Comorbidity*, 2023

| Age group | Number of comorbidities | Vaccinated <sup>a</sup> |           |      |               | Unvaccinated <sup>a</sup> |           |       |                 |
|-----------|-------------------------|-------------------------|-----------|------|---------------|---------------------------|-----------|-------|-----------------|
|           |                         | Event                   | Non-event | %    | 95% CI        | Event                     | Non-event | %     | 95% CI          |
| ≥75       | 2                       | 9                       | 2,079     | 0.43 | (0.22 - 0.83) | 7                         | 107       | 6.14  | (3.00 - 12.59)  |
|           | ≥3                      | 74                      | 3,028     | 2.39 | (1.90 - 2.99) | 29                        | 180       | 13.88 | (9.90 - 19.45)  |
|           | 0                       | 12                      | 808       | 1.46 | (0.83 - 2.57) | 8                         | 66        | 10.81 | (5.62 - 20.80)  |
|           | 1                       | 55                      | 1,700     | 3.13 | (2.42 - 4.06) | 22                        | 111       | 16.54 | (11.29 - 24.23) |
|           | 2                       | 64                      | 1,749     | 3.53 | (2.78 - 4.49) | 26                        | 110       | 19.12 | (13.53 - 27.01) |
|           | ≥3                      | 564                     | 6,850     | 7.61 | (7.03 - 8.24) | 105                       | 376       | 21.83 | (18.43 - 25.85) |

Abbreviations: CI: confidence interval; ICU: Intensive care unit

<sup>a</sup> The vaccinated group included all individuals adequately vaccinated, i.e., all individuals who received two vaccine doses (or one Janssen vaccine dose) or a combination of these vaccines with a respected minimal interval between the 2 doses. The unvaccinated group included all other individuals.

Supplementary File

Simard M., Boiteau V, Fortin E, Jean S, Rochette L, Trépanier PL, Gilca R. Impact of chronic comorbidities on hospitalization, intensive care unit admission and death among adult vaccinated and unvaccinated COVID-19 confirmed cases during the Omicron wave, *Journal of Multimorbidity and Comorbidity*, 2023

**Table A.3:** Percentage and 95% confidence interval of adults with COVID-19 identified between Dec 26<sup>th</sup> 2021-Jan 9<sup>th</sup> 2022 with COVID-19 hospitalisation, intensive care unit admission, or death by 13<sup>th</sup> February 2022 by number of comorbidities, stratified by age and vaccination status during the Omicron wave, Québec, Canada (n=174,743).

| Age group              | Number of comorbidities | Vaccinated <sup>a</sup> |                 | Unvaccinated <sup>a</sup> |                 |
|------------------------|-------------------------|-------------------------|-----------------|---------------------------|-----------------|
|                        |                         | %                       | 95% CI          | %                         | 95% CI          |
| <b>Hospitalization</b> |                         |                         |                 |                           |                 |
| 18-49                  | 0                       | 0.20                    | (0.17 - 0.23)   | 1.79                      | (1.54 - 2.09)   |
|                        | 1                       | 0.39                    | (0.32 - 0.49)   | 2.12                      | (1.61 - 2.78)   |
|                        | 2                       | 0.50                    | (0.34 - 0.72)   | 3.53                      | (2.39 - 5.24)   |
|                        | ≥3                      | 2.54                    | (2.04 - 3.17)   | 6.35                      | (4.44 - 9.09)   |
| 50-64                  | 0                       | 0.30                    | (0.23 - 0.40)   | 4.25                      | (3.27 - 5.52)   |
|                        | 1                       | 0.50                    | (0.38 - 0.66)   | 6.26                      | (4.65 - 8.42)   |
|                        | 2                       | 1.31                    | (1.00 - 1.71)   | 7.56                      | (4.78 - 11.93)  |
|                        | ≥3                      | 5.40                    | (4.70 - 6.20)   | 19.78                     | (15.58 - 25.12) |
| 65-74                  | 0                       | 1.83                    | (1.36 - 2.46)   | 18.82                     | (13.96 - 25.36) |
|                        | 1                       | 2.64                    | (2.07 - 3.35)   | 26.13                     | (19.11 - 35.72) |
|                        | 2                       | 3.81                    | (2.95 - 4.91)   | 29.87                     | (21.21 - 42.06) |
|                        | ≥3                      | 13.33                   | (12.03 - 14.75) | 30.32                     | (23.89 - 38.50) |
| ≥75                    | 0                       | 7.28                    | (5.50 - 9.65)   | 33.90                     | (23.74 - 48.41) |
|                        | 1                       | 9.59                    | (8.15 - 11.29)  | 37.62                     | (29.27 - 48.36) |
|                        | 2                       | 10.47                   | (9.01 - 12.17)  | 34.91                     | (26.91 - 45.27) |
|                        | ≥3                      | 16.28                   | (15.40 - 17.20) | 34.66                     | (30.30 - 39.65) |
| <b>ICU admission</b>   |                         |                         |                 |                           |                 |
| 18-49                  | 0                       | 0.01                    | (0.00 - 0.02)   | 0.26                      | (0.17 - 0.39)   |
|                        | 1                       | 0.03                    | (0.01 - 0.06)   | 0.47                      | (0.26 - 0.84)   |
|                        | 2                       | 0.07                    | (0.03 - 0.20)   | 0.88                      | (0.40 - 1.95)   |
|                        | ≥3                      | 0.23                    | (0.11 - 0.48)   | 0.67                      | (0.22 - 2.08)   |
| 50-64                  | 0                       | 0.07                    | (0.04 - 0.11)   | 1.26                      | (0.77 - 2.05)   |
|                        | 1                       | 0.09                    | (0.05 - 0.17)   | 2.44                      | (1.50 - 3.96)   |
|                        | 2                       | 0.22                    | (0.12 - 0.43)   | 1.78                      | (0.67 - 4.70)   |
|                        | ≥3                      | 1.15                    | (0.84 - 1.56)   | 4.98                      | (2.99 - 8.30)   |
| 65-74                  | 0                       | 0.34                    | (0.17 - 0.68)   | 7.94                      | (4.88 - 12.90)  |
|                        | 1                       | 0.36                    | (0.19 - 0.70)   | 11.30                     | (6.77 - 18.86)  |
|                        | 2                       | 0.47                    | (0.22 - 0.98)   | 12.82                     | (7.19 - 22.87)  |
|                        | ≥3                      | 2.03                    | (1.54 - 2.68)   | 5.00                      | (2.54 - 9.82)   |
| ≥75                    | 0                       | 0.65                    | (0.24 - 1.72)   | 7.94                      | (3.42 - 18.40)  |
|                        | 1                       | 0.59                    | (0.29 - 1.17)   | 8.33                      | (4.46 - 15.58)  |
|                        | 2                       | 0.76                    | (0.42 - 1.36)   | 6.54                      | (3.20 - 13.39)  |
|                        | ≥3                      | 1.20                    | (0.96 - 1.50)   | 3.99                      | (2.50 - 6.36)   |

Supplementary File

Simard M., Boiteau V, Fortin E, Jean S, Rochette L, Trépanier PL, Gilca R. Impact of chronic comorbidities on hospitalization, intensive care unit admission and death among adult vaccinated and unvaccinated COVID-19 confirmed cases during the Omicron wave, *Journal of Multimorbidity and Comorbidity*, 2023

| Age group    | Number of comorbidities | Vaccinated <sup>a</sup> |               | Unvaccinated <sup>a</sup> |                 |
|--------------|-------------------------|-------------------------|---------------|---------------------------|-----------------|
|              |                         | %                       | 95% CI        | %                         | 95% CI          |
| <b>Death</b> |                         |                         |               |                           |                 |
| 18-49        | 0                       | <0.01                   | (0.00 - 0.01) | 0.03                      | (0.01 - 0.10)   |
|              | 1                       | 0.01                    | (0.00 - 0.04) | <0.01                     | (0.00 - 0.20)   |
|              | 2                       | 0.04                    | (0.01 - 0.15) | 0.15                      | (0.02 - 1.04)   |
|              | ≥3                      | 0.06                    | (0.01 - 0.40) | <0.01                     | (0.00 - 1.04)   |
| 50-64        | 0                       | 0.03                    | (0.01 - 0.07) | 0.16                      | (0.04 - 0.63)   |
|              | 1                       | 0.05                    | (0.02 - 0.12) | 0.61                      | (0.23 - 1.62)   |
|              | 2                       | 0.12                    | (0.05 - 0.30) | 1.78                      | (0.67 - 4.70)   |
|              | ≥3                      | 0.75                    | (0.51 - 1.09) | 3.30                      | (1.73 - 6.27)   |
| 65-74        | 0                       | 0.21                    | (0.09 - 0.51) | 4.30                      | (2.18 - 8.47)   |
|              | 1                       | 0.45                    | (0.25 - 0.80) | 2.70                      | (0.89 - 8.25)   |
|              | 2                       | 0.33                    | (0.14 - 0.80) | 5.19                      | (2.00 - 13.49)  |
|              | ≥3                      | 2.37                    | (1.83 - 3.06) | 12.26                     | (8.04 - 18.68)  |
| ≥75          | 0                       | 1.94                    | (1.11 - 3.40) | 6.78                      | (2.63 - 17.46)  |
|              | 1                       | 3.29                    | (2.47 - 4.39) | 17.82                     | (11.72 - 27.09) |
|              | 2                       | 4.06                    | (3.16 - 5.22) | 19.81                     | (13.51 - 29.06) |
|              | ≥3                      | 7.62                    | (7.00 - 8.30) | 21.20                     | (17.55 - 25.60) |

Abbreviations: CI: confidence interval; ICU: Intensive care unit

<sup>a</sup> The vaccinated group included all individuals adequately vaccinated, i.e., all individuals who received two vaccine doses (or one Janssen vaccine dose) or a combination of these vaccines with a respected minimal interval between the 2 doses. The unvaccinated group included all other individuals.

Supplementary File

Simard M., Boiteau V, Fortin E, Jean S, Rochette L, Trépanier PL, Gilca R. Impact of chronic comorbidities on hospitalization, intensive care unit admission and death among adult vaccinated and unvaccinated COVID-19 confirmed cases during the Omicron wave, *Journal of Multimorbidity and Comorbidity*, 2023

**Table A.4:** Percentage and 95% confidence interval of adults with COVID-19 (including hospital-associated infections cases) identified between Dec 5th 2021-Jan 9th 2022 with COVID-19 hospitalisation, intensive care unit admission, or death by 13th February 2022 by number of comorbidities, stratified by age and vaccination status (n=246,584).

| Age group                          | Number of comorbidities | Vaccinated <sup>a</sup> |                 | Unvaccinated <sup>a</sup> |                 |
|------------------------------------|-------------------------|-------------------------|-----------------|---------------------------|-----------------|
|                                    |                         | %                       | 95% CI          | %                         | 95% CI          |
| <b>Hospitalization<sup>b</sup></b> |                         |                         |                 |                           |                 |
| 18-49                              | 0                       | 0.18                    | (0.16 - 0.21)   | 1.82                      | (1.61 - 2.06)   |
|                                    | 1                       | 0.34                    | (0.28 - 0.41)   | 2.17                      | (1.73 - 2.71)   |
|                                    | 2                       | 0.59                    | (0.44 - 0.79)   | 3.83                      | (2.80 - 5.23)   |
|                                    | ≥3                      | 2.70                    | (2.24 - 3.26)   | 7.25                      | (5.44 - 9.67)   |
| 50-64                              | 0                       | 0.31                    | (0.25 - 0.39)   | 5.28                      | (4.35 - 6.42)   |
|                                    | 1                       | 0.64                    | (0.52 - 0.79)   | 7.56                      | (6.05 - 9.43)   |
|                                    | 2                       | 1.40                    | (1.12 - 1.76)   | 9.58                      | (6.89 - 13.32)  |
|                                    | ≥3                      | 5.82                    | (5.16 - 6.56)   | 19.68                     | (16.05 - 24.14) |
| 65-74                              | 0                       | 1.74                    | (1.35 - 2.24)   | 19.32                     | (15.10 - 24.72) |
|                                    | 1                       | 3.10                    | (2.58 - 3.73)   | 27.22                     | (21.27 - 34.83) |
|                                    | 2                       | 4.28                    | (3.50 - 5.24)   | 29.57                     | (22.30 - 39.20) |
|                                    | ≥3                      | 14.75                   | (13.56 - 16.03) | 36.45                     | (30.54 - 43.50) |
| ≥75                                | 0                       | 9.36                    | (7.59 - 11.55)  | 38.46                     | (29.05 - 50.93) |
|                                    | 1                       | 11.47                   | (10.09 - 13.04) | 39.29                     | (31.97 - 48.27) |
|                                    | 2                       | 11.95                   | (10.57 - 13.53) | 37.68                     | (30.40 - 46.70) |
|                                    | ≥3                      | 19.35                   | (18.49 - 20.26) | 40.47                     | (36.42 - 44.97) |
| <b>ICU admission<sup>c</sup></b>   |                         |                         |                 |                           |                 |
| 18-49                              | 0                       | 0.01                    | (0.00 - 0.02)   | 0.33                      | (0.25 - 0.44)   |
|                                    | 1                       | 0.03                    | (0.02 - 0.06)   | 0.50                      | (0.31 - 0.80)   |
|                                    | 2                       | 0.09                    | (0.04 - 0.20)   | 0.91                      | (0.47 - 1.74)   |
|                                    | ≥3                      | 0.33                    | (0.19 - 0.57)   | 1.01                      | (0.46 - 2.24)   |
| 50-64                              | 0                       | 0.06                    | (0.04 - 0.10)   | 2.04                      | (1.48 - 2.80)   |
|                                    | 1                       | 0.11                    | (0.06 - 0.18)   | 2.73                      | (1.87 - 3.99)   |
|                                    | 2                       | 0.27                    | (0.16 - 0.45)   | 2.40                      | (1.21 - 4.75)   |
|                                    | ≥3                      | 1.11                    | (0.84 - 1.47)   | 5.05                      | (3.26 - 7.83)   |
| 65-74                              | 0                       | 0.38                    | (0.22 - 0.66)   | 7.58                      | (4.97 - 11.55)  |
|                                    | 1                       | 0.49                    | (0.30 - 0.78)   | 12.43                     | (8.33 - 18.54)  |
|                                    | 2                       | 0.81                    | (0.50 - 1.30)   | 14.78                     | (9.53 - 22.93)  |
|                                    | ≥3                      | 2.37                    | (1.89 - 2.96)   | 8.41                      | (5.41 - 13.09)  |
| ≥75                                | 0                       | 0.59                    | (0.25 - 1.42)   | 8.97                      | (4.43 - 18.19)  |
|                                    | 1                       | 0.67                    | (0.38 - 1.17)   | 7.14                      | (3.93 - 12.98)  |



Supplementary File

Simard M., Boiteau V, Fortin E, Jean S, Rochette L, Trépanier PL, Gilca R. Impact of chronic comorbidities on hospitalization, intensive care unit admission and death among adult vaccinated and unvaccinated COVID-19 confirmed cases during the Omicron wave, *Journal of Multimorbidity and Comorbidity*, 2023

| Age group    | Number of comorbidities | Vaccinated <sup>a</sup> |                | Unvaccinated <sup>a</sup> |                 |
|--------------|-------------------------|-------------------------|----------------|---------------------------|-----------------|
|              |                         | %                       | 95% CI         | %                         | 95% CI          |
|              | 2                       | 0.92                    | (0.57 - 1.47)  | 6.52                      | (3.47 - 12.27)  |
|              | ≥3                      | 1.36                    | (1.12 - 1.64)  | 4.13                      | (2.71 - 6.27)   |
| <b>Death</b> |                         |                         |                |                           |                 |
| 18-49        | 0                       | <0.01                   | (0.00 - 0.004) | 0.02                      | (0.01 - 0.07)   |
|              | 1                       | <0.01                   | (0.00 - 0.03)  | <0.01                     | (0.00 - 0.14)   |
|              | 2                       | 0.03                    | (0.01 - 0.11)  | 0.20                      | (0.05 - 0.80)   |
|              | ≥3                      | 0.05                    | (0.01 - 0.20)  | 0.17                      | (0.02 - 1.20)   |
| 50-64        | 0                       | 0.02                    | (0.01 - 0.05)  | 0.17                      | (0.05 - 0.51)   |
|              | 1                       | 0.06                    | (0.03 - 0.12)  | 1.05                      | (0.57 - 1.94)   |
|              | 2                       | 0.21                    | (0.12 - 0.38)  | 1.80                      | (0.81 - 3.97)   |
|              | ≥3                      | 0.83                    | (0.60 - 1.15)  | 2.66                      | (1.44 - 4.90)   |
| 65-74        | 0                       | 0.27                    | (0.14 - 0.51)  | 3.79                      | (2.06 - 6.96)   |
|              | 1                       | 0.46                    | (0.28 - 0.75)  | 5.92                      | (3.24 - 10.79)  |
|              | 2                       | 0.48                    | (0.26 - 0.88)  | 6.09                      | (2.97 - 12.48)  |
|              | ≥3                      | 2.65                    | (2.15 - 3.28)  | 13.55                     | (9.66 - 19.01)  |
| ≥75          | 0                       | 1.66                    | (0.99 - 2.79)  | 10.26                     | (5.32 - 19.77)  |
|              | 1                       | 3.33                    | (2.59 - 4.27)  | 16.43                     | (11.31 - 23.87) |
|              | 2                       | 3.66                    | (2.90 - 4.62)  | 19.57                     | (13.95 - 27.44) |
|              | ≥3                      | 8.24                    | (7.65 - 8.88)  | 21.61                     | (18.32 - 25.50) |

Abbreviations: CI: confidence interval; ICU: Intensive care unit

<sup>a</sup> The vaccinated group included all individuals adequately vaccinated, i.e., all individuals who received two vaccine doses (or one Janssen vaccine dose) or a combination of these vaccines with a respected minimal interval between the 2 doses. The unvaccinated group included all other individuals.

<sup>b</sup> Index hospitalisation when the cases have been potentially infected at hospital (nosocomial case) are included in the numerator

<sup>c</sup> ICU admission occurring during the index hospitalisation are included in the numerator

Supplementary File

Simard M., Boiteau V, Fortin E, Jean S, Rochette L, Trépanier PL, Gilca R. Impact of chronic comorbidities on hospitalization, intensive care unit admission and death among adult vaccinated and unvaccinated COVID-19 confirmed cases during the Omicron wave, *Journal of Multimorbidity and Comorbidity*, 2023

**Table A.5** Percentage and 95% confidence interval of adults with COVID-19 identified between Dec 5<sup>th</sup> 2021-Jan 9<sup>th</sup> 2022 with COVID-19 hospitalisation, intensive care unit admission, or death by 13<sup>th</sup> February 2022 by number of comorbidities, stratified by age and number of vaccine doses during the Omicron wave, Québec, Canada (n=245,816).

| Age group              | Number of comorbidities | 0 vaccine dose |                 | 1 vaccine dose <sup>a</sup> |                 | 2 vaccine doses |                 | ≥3 vaccine doses <sup>b</sup> |                 |
|------------------------|-------------------------|----------------|-----------------|-----------------------------|-----------------|-----------------|-----------------|-------------------------------|-----------------|
|                        |                         | %              | 95% CI          | %                           | 95% CI          | %               | 95% CI          | %                             | 95% CI          |
| <b>Hospitalization</b> |                         |                |                 |                             |                 |                 |                 |                               |                 |
| 18-49                  | 0                       | 2.01           | (1.76 - 2.29)   | 0.91                        | (0.60 - 1.37)   | 0.17            | (0.14 - 0.19)   | 0.26                          | (0.17 - 0.41)   |
|                        | 1                       | 2.26           | (1.76 - 2.90)   | 1.82                        | (1.04 - 3.19)   | 0.34            | (0.28 - 0.42)   | 0.30                          | (0.15 - 0.61)   |
|                        | 2                       | 4.30           | (3.10 - 5.98)   | 1.06                        | (0.27 - 4.20)   | 0.54            | (0.39 - 0.75)   | 0.34                          | (0.11 - 1.06)   |
|                        | ≥3                      | 7.47           | (5.41 - 10.32)  | 4.13                        | (1.75 - 9.75)   | 1.92            | (1.51 - 2.45)   | 4.79                          | (3.33 - 6.87)   |
| 50-64                  | 0                       | 5.99           | (4.91 - 7.30)   | 1.18                        | (0.38 - 3.64)   | 0.30            | (0.23 - 0.38)   | 0.16                          | (0.07 - 0.38)   |
|                        | 1                       | 8.74           | (6.96 - 10.97)  | 1.95                        | (0.64 - 5.97)   | 0.55            | (0.43 - 0.70)   | 0.66                          | (0.38 - 1.13)   |
|                        | 2                       | 9.61           | (6.71 - 13.75)  | 8.16                        | (3.19 - 20.88)  | 1.12            | (0.85 - 1.48)   | 1.90                          | (1.19 - 3.04)   |
|                        | ≥3                      | 20.14          | (15.97 - 25.40) | 12.16                       | (6.59 - 22.44)  | 4.72            | (4.05 - 5.49)   | 6.51                          | (5.14 - 8.25)   |
| 65-74                  | 0                       | 20.00          | (15.44 - 25.90) | 6.90                        | (1.81 - 26.27)  | 1.72            | (1.28 - 2.29)   | 0.79                          | (0.35 - 1.74)   |
|                        | 1                       | 28.28          | (21.82 - 36.64) | 5.88                        | (0.88 - 39.39)  | 2.46            | (1.92 - 3.13)   | 2.56                          | (1.71 - 3.83)   |
|                        | 2                       | 29.70          | (22.00 - 40.10) | 18.18                       | (5.19 - 63.69)  | 4.04            | (3.15 - 5.19)   | 2.70                          | (1.69 - 4.32)   |
|                        | ≥3                      | 39.49          | (32.54 - 47.93) | 24.44                       | (14.62 - 40.86) | 14.10           | (12.65 - 15.73) | 10.90                         | (9.23 - 12.87)  |
| ≥75                    | 0                       | 36.07          | (25.82 - 50.37) | 36.36                       | (16.64 - 79.47) | 8.79            | (6.46 - 11.96)  | 4.49                          | (2.86 - 7.05)   |
|                        | 1                       | 39.81          | (31.57 - 50.21) | 20.00                       | (9.13 - 43.80)  | 11.73           | (9.77 - 14.09)  | 6.38                          | (4.96 - 8.20)   |
|                        | 2                       | 42.72          | (34.16 - 53.42) | 16.13                       | (7.23 - 35.99)  | 14.63           | (12.36 - 17.32) | 6.22                          | (4.91 - 7.89)   |
|                        | ≥3                      | 40.88          | (36.12 - 46.28) | 28.43                       | (20.90 - 38.68) | 26.61           | (24.97 - 28.35) | 11.23                         | (10.37 - 12.16) |
| <b>ICU admission</b>   |                         |                |                 |                             |                 |                 |                 |                               |                 |
| 18-49                  | 0                       | 0.39           | (0.29 - 0.53)   | 0.08                        | (0.02 - 0.33)   | 0.01            | (0.01 - 0.02)   | <0.01                         | (0.00 - 0.06)   |
|                        | 1                       | 0.59           | (0.36 - 0.97)   | 0.15                        | (0.02 - 1.08)   | 0.03            | (0.01 - 0.06)   | 0.08                          | (0.02 - 0.30)   |
|                        | 2                       | 1.14           | (0.59 - 2.18)   | <0.01                       | (0.00 - 2.40)   | 0.11            | (0.05 - 0.22)   | <0.01                         | (0.00 - 0.53)   |
|                        | ≥3                      | 1.32           | (0.60 - 2.92)   | <0.01                       | (0.00 - 3.70)   | 0.21            | (0.10 - 0.44)   | 0.68                          | (0.26 - 1.82)   |

Supplementary File

Simard M., Boiteau V, Fortin E, Jean S, Rochette L, Trépanier PL, Gilca R. Impact of chronic comorbidities on hospitalization, intensive care unit admission and death among adult vaccinated and unvaccinated COVID-19 confirmed cases during the Omicron wave, *Journal of Multimorbidity and Comorbidity*, 2023

| Age group    | Number of comorbidities | 0 vaccine dose |                 | 1 vaccine dose <sup>a</sup> |                | 2 vaccine doses |                | ≥3 vaccine doses <sup>b</sup> |               |
|--------------|-------------------------|----------------|-----------------|-----------------------------|----------------|-----------------|----------------|-------------------------------|---------------|
|              |                         | %              | 95% CI          | %                           | 95% CI         | %               | 95% CI         | %                             | 95% CI        |
| 50-64        | 0                       | 2.34           | (1.70 - 3.24)   | 0.39                        | (0.06 - 2.78)  | 0.06            | (0.04 - 0.11)  | 0.03                          | (0.00 - 0.23) |
|              | 1                       | 2.96           | (1.98 - 4.42)   | 1.30                        | (0.33 - 5.15)  | 0.11            | (0.06 - 0.19)  | 0.10                          | (0.03 - 0.40) |
|              | 2                       | 2.85           | (1.44 - 5.64)   | <0.01                       | (0.00 - 8.68)  | 0.18            | (0.09 - 0.37)  | 0.45                          | (0.17 - 1.19) |
|              | ≥3                      | 6.36           | (4.07 - 9.95)   | 1.35                        | (0.19 - 9.47)  | 1.02            | (0.73 - 1.43)  | 1.22                          | (0.70 - 2.14) |
| 65-74        | 0                       | 8.26           | (5.37 - 12.71)  | 3.45                        | (0.50 - 23.66) | 0.34            | (0.18 - 0.66)  | 0.13                          | (0.02 - 0.93) |
|              | 1                       | 13.79          | (9.18 - 20.72)  | <0.01                       | (0.00 - 21.63) | 0.47            | (0.27 - 0.82)  | 0.33                          | (0.11 - 1.03) |
|              | 2                       | 14.85          | (9.31 - 23.69)  | 9.09                        | (1.40 - 58.91) | 0.89            | (0.52 - 1.53)  | 0.64                          | (0.24 - 1.69) |
|              | ≥3                      | 10.83          | (6.91 - 16.96)  | 2.22                        | (0.32 - 15.43) | 2.84            | (2.19 - 3.68)  | 1.41                          | (0.86 - 2.29) |
| ≥75          | 0                       | 11.48          | (5.72 - 23.04)  | <0.01                       | (0.00 - 30.02) | 0.95            | (0.36 - 2.52)  | <0.01                         | (0.00 - 1.14) |
|              | 1                       | 7.41           | (3.80 - 14.43)  | <0.01                       | (0.00 - 15.76) | 0.93            | (0.47 - 1.85)  | 0.45                          | (0.17 - 1.19) |
|              | 2                       | 8.74           | (4.68 - 16.31)  | <0.01                       | (0.00 - 13.09) | 1.27            | (0.69 - 2.36)  | 0.58                          | (0.26 - 1.29) |
|              | ≥3                      | 4.70           | (2.95 - 7.47)   | 2.94                        | (0.96 - 8.97)  | 2.62            | (2.08 - 3.31)  | 0.60                          | (0.42 - 0.87) |
| <b>Death</b> |                         |                |                 |                             |                |                 |                |                               |               |
| 18-49        | 0                       | 0.03           | (0.01 - 0.09)   | <0.01                       | (0.00 - 0.19)  | <0.01           | (0.00 - 0.004) | <0.01                         | (0.00 - 0.06) |
|              | 1                       | <0.01          | (0.00 - 0.17)   | <0.01                       | (0.00 - 0.70)  | <0.01           | (0.00 - 0.03)  | <0.01                         | (0.00 - 0.18) |
|              | 2                       | 0.25           | (0.06 - 1.01)   | <0.01                       | (0.00 - 2.40)  | 0.02            | (0.00 - 0.11)  | 0.11                          | (0.02 - 0.81) |
|              | ≥3                      | 0.22           | (0.03 - 1.56)   | <0.01                       | (0.00 - 3.70)  | 0.03            | (0.00 - 0.21)  | 0.17                          | (0.02 - 1.21) |
| 50-64        | 0                       | 0.20           | (0.06 - 0.60)   | <0.01                       | (0.00 - 1.79)  | 0.02            | (0.01 - 0.05)  | 0.03                          | (0.00 - 0.23) |
|              | 1                       | 1.29           | (0.69 - 2.38)   | <0.01                       | (0.00 - 2.93)  | 0.07            | (0.04 - 0.14)  | <0.01                         | (0.00 - 0.23) |
|              | 2                       | 1.78           | (0.75 - 4.24)   | 2.04                        | (0.29 - 14.20) | 0.05            | (0.01 - 0.18)  | 0.56                          | (0.23 - 1.34) |
|              | ≥3                      | 3.18           | (1.67 - 6.05)   | 1.35                        | (0.19 - 9.47)  | 0.51            | (0.32 - 0.82)  | 1.73                          | (1.08 - 2.77) |
| 65-74        | 0                       | 3.91           | (2.06 - 7.42)   | 3.45                        | (0.50 - 23.66) | 0.15            | (0.06 - 0.41)  | 0.26                          | (0.07 - 1.05) |
|              | 1                       | 6.21           | (3.30 - 11.69)  | <0.01                       | (0.00 - 21.63) | 0.39            | (0.21 - 0.72)  | 0.45                          | (0.17 - 1.18) |
|              | 2                       | 6.93           | (3.39 - 14.16)  | <0.01                       | (0.00 - 30.02) | 0.27            | (0.10 - 0.73)  | 0.79                          | (0.33 - 1.90) |
|              | ≥3                      | 15.29          | (10.58 - 22.09) | 11.11                       | (4.86 - 25.39) | 2.49            | (1.89 - 3.28)  | 2.20                          | (1.49 - 3.24) |

Supplementary File

*Simard M., Boiteau V, Fortin E, Jean S, Rochette L, Trépanier PL, Gilca R. Impact of chronic comorbidities on hospitalization, intensive care unit admission and death among adult vaccinated and unvaccinated COVID-19 confirmed cases during the Omicron wave, Journal of Multimorbidity and Comorbidity, 2023*

| Age group | Number of comorbidities | 0 vaccine dose |                 | 1 vaccine dose <sup>a</sup> |                 | 2 vaccine doses |                | ≥3 vaccine doses <sup>b</sup> |               |
|-----------|-------------------------|----------------|-----------------|-----------------------------|-----------------|-----------------|----------------|-------------------------------|---------------|
|           |                         | %              | 95% CI          | %                           | 95% CI          | %               | 95% CI         | %                             | 95% CI        |
| ≥75       | 0                       | 13.11          | (6.87 - 25.02)  | <0.01                       | (0.00 - 30.02)  | 1.90            | (0.96 - 3.77)  | 1.00                          | (0.38 - 2.64) |
|           | 1                       | 17.59          | (11.70 - 26.46) | 12.00                       | (4.15 - 34.69)  | 4.30            | (3.14 - 5.89)  | 2.01                          | (1.27 - 3.18) |
|           | 2                       | 18.45          | (12.29 - 27.69) | 22.58                       | (11.77 - 43.33) | 4.07            | (2.90 - 5.72)  | 3.11                          | (2.21 - 4.37) |
|           | ≥3                      | 24.59          | (20.53 - 29.45) | 15.69                       | (10.00 - 24.60) | 10.68           | (9.56 - 11.93) | 5.90                          | (5.27 - 6.60) |

Abbreviations: CI: confidence interval; ICU: Intensive care unit

<sup>a</sup> Cases with 1 Janssen vaccine dose are excluded from the one vaccine dose group.

<sup>b</sup> 97 cases have ≥4 vaccine doses

Supplementary File

Simard M., Boiteau V, Fortin E, Jean S, Rochette L, Trépanier PL, Gilca R. Impact of chronic comorbidities on hospitalization, intensive care unit admission and death among adult vaccinated and unvaccinated COVID-19 confirmed cases during the Omicron wave, *Journal of Multimorbidity and Comorbidity*, 2023

**Table A.6:** Description of adults with COVID-19 identified between Dec 5<sup>th</sup> 2021-Jan 9<sup>th</sup> 2022 in the study population with available information on pre-existing medical conditions (n=245,956) and in the surveillance database (n=253,534) during the Omicron wave, Québec, Canada

| Variable                | Study population<br>n = 245,956 |          | All confirmed cases in the<br>surveillance database<br>n = 253,534 |          |
|-------------------------|---------------------------------|----------|--------------------------------------------------------------------|----------|
|                         | n                               | (%)      | n                                                                  | (%)      |
| Mean age; mean $\pm$ SD | 42                              | $\pm$ 17 | 42                                                                 | $\pm$ 17 |
| Age group               |                                 |          |                                                                    |          |
| 18-49                   | 169,846                         | 69.1     | 176,165                                                            | 69.5     |
| 50-64                   | 50,699                          | 20.6     | 51,291                                                             | 20.2     |
| 65-74                   | 12,785                          | 5.2      | 13,006                                                             | 5.1      |
| 75+                     | 12,626                          | 5.1      | 13,072                                                             | 5.2      |
| Sex                     |                                 |          |                                                                    |          |
| Women                   | 136,175                         | 55.4     | 139,235                                                            | 54.9     |
| Men                     | 109,781                         | 44.6     | 114,299                                                            | 45.1     |
| Living environment      |                                 |          |                                                                    |          |
| At home                 | 239,058                         | 97.2     | 246,416                                                            | 97.2     |
| CHSLDs                  | 2,276                           | 0.9      | 2,319                                                              | 0.9      |
| RPA                     | 3,144                           | 1.3      | 3,230                                                              | 1.3      |
| Others                  | 1,478                           | 0.6      | 1,569                                                              | 0.6      |
| Number of vaccine doses |                                 |          |                                                                    |          |
| 0                       | 18,789                          | 7.6      | 20,531                                                             | 8.1      |
| 1                       | 4,338                           | 1.8      | 4,576                                                              | 1.8      |
| 2                       | 194,025                         | 78.9     | 199,210                                                            | 78.6     |
| 3                       | 28,707                          | 11.7     | 29,119                                                             | 11.5     |
| 4+                      | 97                              | 0.0      | 98                                                                 | 0.0      |
| CDC week                |                                 |          |                                                                    |          |
| 2021-49                 | 6,615                           | 2.7      | 6,824                                                              | 2.7      |
| 2021-50                 | 15,277                          | 6.2      | 15,773                                                             | 6.2      |
| 2021-51                 | 49,321                          | 20.1     | 50,716                                                             | 20.0     |
| 2021-52                 | 85,430                          | 34.7     | 87,816                                                             | 34.6     |
| 2022-01                 | 89,313                          | 36.3     | 92,405                                                             | 36.4     |
| Hospitalisation         |                                 |          |                                                                    |          |
| Yes                     | 4,242                           | 1.7      | 4,941                                                              | 1.9      |
| ICU admissions          |                                 |          |                                                                    |          |
| Yes                     | 650                             | 0.3      | 688                                                                | 0.3      |
| Death                   |                                 |          |                                                                    |          |
| Yes                     | 1,108                           | 0.5      | 1,222                                                              | 0.5      |

Abbreviations: CDC: Centers for Disease Control and Prevention; CHSLD: Long-term care or nursing facilities; ICU: Intensive care unit; RPA: private seniors' residences.

Supplementary File

Simard M., Boiteau V, Fortin E, Jean S, Rochette L, Trépanier PL, Gilca R. Impact of chronic comorbidities on hospitalization, intensive care unit admission and death among adult vaccinated and unvaccinated COVID-19 confirmed cases during the Omicron wave, *Journal of Multimorbidity and Comorbidity*, 2023

**Table A.7:** Association between the number of comorbidities and the risks of COVID-19 hospitalisation, intensive care unit admission or death by 13<sup>th</sup> February 2022 while accounting for vaccination status during the Omicron wave among adults with COVID-19 identified during the Omicron wave (Dec 26<sup>th</sup> 2021-Jan 9<sup>th</sup> 2022, Quebec, Canada) (n=174,743)

| Vaccination status <sup>a</sup> | Number of comorbidities | Frequency |           | Adjusted Relative Risk |                   |
|---------------------------------|-------------------------|-----------|-----------|------------------------|-------------------|
|                                 |                         | Event     | Non-event | RRa                    | [IC95%]           |
| <b>Hospitalization</b>          |                         |           |           |                        |                   |
| Vaccinated                      | 0                       | 293       | 96,528    | 1.00                   | (reference group) |
|                                 | 1                       | 325       | 33,510    | 2.04                   | [1.74 - 2.39]     |
|                                 | 2                       | 289       | 12,150    | 3.30                   | [2.79 - 3.91]     |
|                                 | ≥3                      | 1,632     | 13,720    | 8.17                   | [7.02 - 9.50]     |
| Unvaccinated                    | 0                       | 274       | 10,436    | 8.91                   | [7.57 - 10.49]    |
|                                 | 1                       | 158       | 3,071     | 12.81                  | [10.64 - 15.41]   |
|                                 | 2                       | 101       | 986       | 15.96                  | [12.88 - 19.76]   |
|                                 | ≥3                      | 268       | 1,002     | 19.35                  | [16.22 - 23.09]   |
| <b>ICU admission</b>            |                         |           |           |                        |                   |
| Vaccinated                      | 0                       | 29        | 96,792    | 1.00                   | (reference group) |
|                                 | 1                       | 31        | 33,804    | 1.80                   | [1.08 - 3.56]     |
|                                 | 2                       | 31        | 12,408    | 3.48                   | [2.05 - 7.23]     |
|                                 | ≥3                      | 173       | 15,179    | 10.79                  | [6.85 - 18.87]    |
| Unvaccinated                    | 0                       | 60        | 10,650    | 20.97                  | [13.43 - 39.22]   |
|                                 | 1                       | 45        | 3,184     | 37.15                  | [23.20 - 61.06]   |
|                                 | 2                       | 27        | 1,060     | 45.25                  | [26.42 - 80.83]   |
|                                 | ≥3                      | 41        | 1,229     | 34.21                  | [20.22 - 69.67]   |
| <b>Death</b>                    |                         |           |           |                        |                   |
| Vaccinated                      | 0                       | 22        | 96,799    | 1.00                   | (reference group) |
|                                 | 1                       | 62        | 33,773    | 2.63                   | [1.59 - 4.32]     |
|                                 | 2                       | 71        | 12,368    | 3.83                   | [2.31 - 6.35]     |
|                                 | ≥3                      | 574       | 14,778    | 8.74                   | [5.43 - 14.08]    |
| Unvaccinated                    | 0                       | 17        | 10,693    | 8.97                   | [4.82 - 16.69]    |
|                                 | 1                       | 25        | 3,204     | 16.36                  | [9.28 - 28.83]    |
|                                 | 2                       | 30        | 1,057     | 23.40                  | [13.33 - 41.08]   |
|                                 | ≥3                      | 113       | 1,157     | 26.57                  | [16.11 - 43.84]   |

Abbreviation: ICU: Intensive care unit; RRa: Relative risk adjusted for age, sex, week, living environment, material and social deprivation

<sup>a</sup> The vaccinated group included all individuals adequately vaccinated, i.e., all individuals who received two vaccine doses (or one Janssen vaccine dose) or a combination of these vaccines with a respected minimal interval between the 2 doses. The unvaccinated group included all other individuals.

Supplementary File

Simard M., Boiteau V, Fortin E, Jean S, Rochette L, Trépanier PL, Gilca R. Impact of chronic comorbidities on hospitalization, intensive care unit admission and death among adult vaccinated and unvaccinated COVID-19 confirmed cases during the Omicron wave, *Journal of Multimorbidity and Comorbidity*, 2023

**Table A.8:** Association between the number of comorbidities and the risks of COVID-19 hospitalisation, intensive care unit admission or death by 13<sup>th</sup> February 2022 while accounting for vaccination status during the Omicron wave among adults with COVID-19 (including hospital-associated infections cases) identified during the Omicron wave (Dec 5<sup>th</sup> 2021-Jan 9<sup>th</sup> 2022, Quebec, Canada) (n=246,584)

| Vaccination status <sup>a</sup> | Number of comorbidities | Frequency |           | Adjusted Relative Risk |                   |
|---------------------------------|-------------------------|-----------|-----------|------------------------|-------------------|
|                                 |                         | Event     | Non-event | RRa                    | [IC95%]           |
| <b>Hospitalization</b>          |                         |           |           |                        |                   |
| Vaccinated                      | 0                       | 293       | 96,528    | 1.00                   | (reference group) |
|                                 | 1                       | 325       | 33,510    | 2.04                   | [1.74 - 2.39]     |
|                                 | 2                       | 289       | 12,150    | 3.30                   | [2.79 - 3.91]     |
|                                 | ≥3                      | 1,632     | 13,720    | 8.17                   | [7.02 - 9.50]     |
| Unvaccinated                    | 0                       | 274       | 10,436    | 8.91                   | [7.57 - 10.49]    |
|                                 | 1                       | 158       | 3,071     | 12.81                  | [10.64 - 15.41]   |
|                                 | 2                       | 101       | 986       | 15.96                  | [12.88 - 19.76]   |
|                                 | ≥3                      | 268       | 1,002     | 19.35                  | [16.22 - 23.09]   |
| <b>ICU admission</b>            |                         |           |           |                        |                   |
| Vaccinated                      | 0                       | 29        | 96,792    | 1.00                   | (reference group) |
|                                 | 1                       | 31        | 33,804    | 1.80                   | [1.08 - 3.56]     |
|                                 | 2                       | 31        | 12,408    | 3.48                   | [2.05 - 7.23]     |
|                                 | ≥3                      | 173       | 15,179    | 10.79                  | [6.85 - 18.87]    |
| Unvaccinated                    | 0                       | 60        | 10,650    | 20.97                  | [13.43 - 39.22]   |
|                                 | 1                       | 45        | 3,184     | 37.15                  | [23.20 - 61.06]   |
|                                 | 2                       | 27        | 1,060     | 45.25                  | [26.42 - 80.83]   |
|                                 | ≥3                      | 41        | 1,229     | 34.21                  | [20.22 - 69.67]   |
| <b>Death</b>                    |                         |           |           |                        |                   |
| Vaccinated                      | 0                       | 22        | 96,799    | 1.00                   | (reference group) |
|                                 | 1                       | 62        | 33,773    | 2.63                   | [1.59 - 4.32]     |
|                                 | 2                       | 71        | 12,368    | 3.83                   | [2.31 - 6.35]     |
|                                 | ≥3                      | 574       | 14,778    | 8.74                   | [5.43 - 14.08]    |
| Unvaccinated                    | 0                       | 17        | 10,693    | 8.97                   | [4.82 - 16.69]    |
|                                 | 1                       | 25        | 3,204     | 16.36                  | [9.28 - 28.83]    |
|                                 | 2                       | 30        | 1,057     | 23.40                  | [13.33 - 41.08]   |
|                                 | ≥3                      | 113       | 1,157     | 26.57                  | [16.11 - 43.84]   |

Abbreviation: ICU: Intensive care unit; RRa: Relative risk adjusted for age, sex, week, living environment, material and social deprivation

<sup>a</sup> The vaccinated group included all individuals adequately vaccinated, i.e., all individuals who received two vaccine doses (or one Janssen vaccine dose) or a combination of these vaccines with a respected minimal interval between the 2 doses. The unvaccinated group included all other individuals.

Supplementary File

Simard M., Boiteau V, Fortin E, Jean S, Rochette L, Trépanier PL, Gilca R. Impact of chronic comorbidities on hospitalization, intensive care unit admission and death among adult vaccinated and unvaccinated COVID-19 confirmed cases during the Omicron wave, *Journal of Multimorbidity and Comorbidity*, 2023

**Table A.9:** Association between the number of comorbidities and the risks of COVID-19 hospitalisation by 13<sup>th</sup> February 2022 by age subgroup while accounting for vaccination status during the Omicron wave among adults with COVID-19 identified during the Omicron wave (Dec 5<sup>th</sup> 2021-Jan 9<sup>th</sup> 2022, Quebec, Canada) (n=245,956)

| Vaccination status <sup>a</sup> | Number of comorbidities | Frequency |           | Adjusted Relative Risk |                   |
|---------------------------------|-------------------------|-----------|-----------|------------------------|-------------------|
|                                 |                         | Event     | Non-event | RRa                    | [IC95%]           |
| <b>18-49 years</b>              |                         |           |           |                        |                   |
| Vaccinated                      | 0                       | 195       | 111,745   | 1.00                   | (reference group) |
|                                 | 1                       | 95        | 28,111    | 1.99                   | [1.55 - 2.54]     |
|                                 | 2                       | 39        | 7,430     | 3.09                   | [2.19 - 4.36]     |
|                                 | ≥3                      | 92        | 3,813     | 13.67                  | [10.67 - 17.51]   |
| Unvaccinated                    | 0                       | 237       | 13,095    | 9.53                   | [7.89 - 11.52]    |
|                                 | 1                       | 73        | 3,341     | 11.97                  | [9.15 - 15.65]    |
|                                 | 2                       | 36        | 955       | 20.39                  | [14.36 - 28.96]   |
|                                 | ≥3                      | 39        | 550       | 35.85                  | [25.66 - 50.08]   |
| <b>50-64 years</b>              |                         |           |           |                        |                   |
| Vaccinated                      | 0                       | 67        | 24,319    | 1.00                   | (reference group) |
|                                 | 1                       | 77        | 13,204    | 2.11                   | [1.52 - 2.93]     |
|                                 | 2                       | 66        | 5,193     | 4.56                   | [3.25 - 6.40]     |
|                                 | ≥3                      | 221       | 4,081     | 18.44                  | [14.06 - 24.20]   |
| Unvaccinated                    | 0                       | 96        | 1,722     | 18.17                  | [13.34 - 24.74]   |
|                                 | 1                       | 71        | 881       | 26.08                  | [18.79 - 36.19]   |
|                                 | 2                       | 31        | 302       | 32.87                  | [21.76 - 49.64]   |
|                                 | ≥3                      | 66        | 302       | 60.97                  | [44.01 - 84.46]   |
| <b>65-74 years</b>              |                         |           |           |                        |                   |
| Vaccinated                      | 0                       | 51        | 3,334     | 1.00                   | (reference group) |
|                                 | 1                       | 86        | 3,375     | 1.65                   | [1.17 - 2.32]     |
|                                 | 2                       | 75        | 2,013     | 2.38                   | [1.67 - 3.38]     |
|                                 | ≥3                      | 402       | 2,700     | 8.71                   | [6.53 - 11.61]    |
| Unvaccinated                    | 0                       | 48        | 213       | 11.55                  | [7.93 - 16.82]    |
|                                 | 1                       | 42        | 123       | 16.23                  | [11.08 - 23.75]   |
|                                 | 2                       | 33        | 81        | 18.63                  | [12.54 - 27.68]   |
|                                 | ≥3                      | 73        | 136       | 23.32                  | [16.78 - 32.42]   |
| <b>≥75 years</b>                |                         |           |           |                        |                   |
| Vaccinated                      | 0                       | 55        | 765       | 1.00                   | (reference group) |
|                                 | 1                       | 158       | 1,597     | 1.37                   | [1.02 - 1.84]     |
|                                 | 2                       | 178       | 1,635     | 1.57                   | [1.18 - 2.11]     |
|                                 | ≥3                      | 1,238     | 6,176     | 2.87                   | [2.21 - 3.73]     |
| Unvaccinated                    | 0                       | 26        | 48        | 5.14                   | [3.43 - 7.69]     |
|                                 | 1                       | 48        | 85        | 5.45                   | [3.89 - 7.65]     |
|                                 | 2                       | 50        | 86        | 5.63                   | [4.04 - 7.85]     |



### Supplementary File

*Simard M., Boiteau V, Fortin E, Jean S, Rochette L, Trépanier PL, Gilca R. Impact of chronic comorbidities on hospitalization, intensive care unit admission and death among adult vaccinated and unvaccinated COVID-19 confirmed cases during the Omicron wave, Journal of Multimorbidity and Comorbidity, 2023*

---

|          |     |     |      |               |
|----------|-----|-----|------|---------------|
| $\geq 3$ | 178 | 303 | 6.10 | [4.62 - 8.07] |
|----------|-----|-----|------|---------------|

---

Abbreviation: ICU: Intensive care unit; RRa: Relative risk adjusted for age, sex, week, living environment, material and social deprivation

<sup>a</sup> The vaccinated group included all individuals adequately vaccinated, i.e., all individuals who received two vaccine doses (or one Janssen vaccine dose) or a combination of these vaccines with a respected minimal interval between the 2 doses. The unvaccinated group included all other individuals.
